# Supplementary material for: CtIP Mutations Cause Seckel and Jawad Syndromes
Source: PLOS journal article supplement (doi:10.1371/journal.pgen.1002310), 2011-10-06

Supplementary figures

A, Jawad

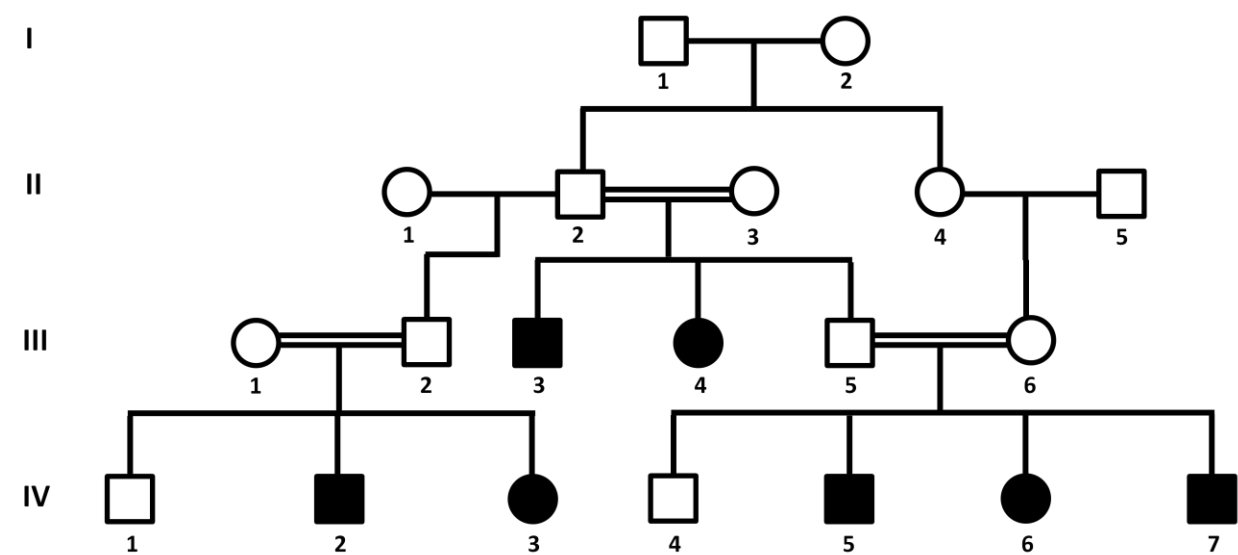

B, SCKL2

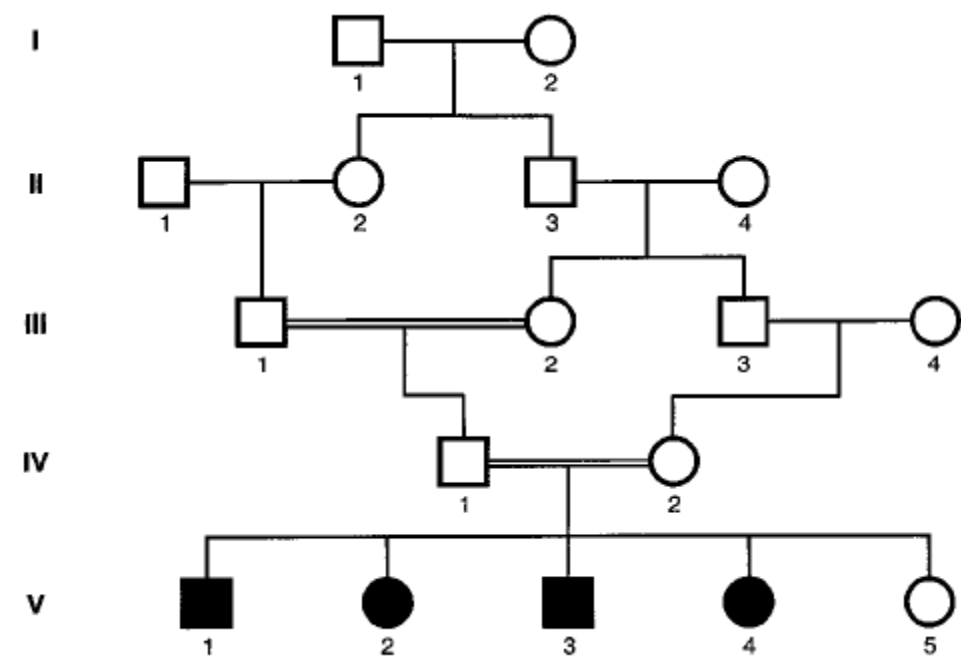

Supplement: S1 (10.1371/journal.pgen.1002310.s001) [file journal.pgen.1002310.s001]
